# Supplementary material
Source: Springer Nature journal article supplement (https://www.springermedizin.de/resource/supplementary/13014_2009_237_MOESM1_ESM.pdf/9633242)
Supplement: MOESM1 [file 9633242]

**63 randomized**

```
graph TD; A[63 randomized] --> B[Placebo]; A --> C[Lactobacillus acidophilus plus bifidobacterium bifidum]; B --> D[31 completed study]; C --> E[32 completed study];
```

**Placebo**

**2 capsules before meals  
2 times a day (morning and evening)**

- 1 week before radiotherapy
- during radiotherapy

**(N=31)**

31 completed study

**Lactobacillus acidophilus plus  
bifidobacterium bifidum**

**2 capsules before meals  
2 times a day (morning and evening)**

- 1 week before radiotherapy
- during radiotherapy

**(N= 32)**

32 completed study
